# Supplementary material for: Efficient disruption and replacement of an effector gene in the oomycete P hytophthora sojae using CRISPR/Cas9
Source: PubMed Central journal article supplement — Mol Plant Pathol. 2015 Nov 11;17(1):127–39. doi: 10.1111/mpp.12318 (PMC6638440; doi:10.1111/mpp.12318), 2015-11-11
Supplement: MPP-17-127-s004.pdf [file MPP-17-127-s004.pdf]

**A**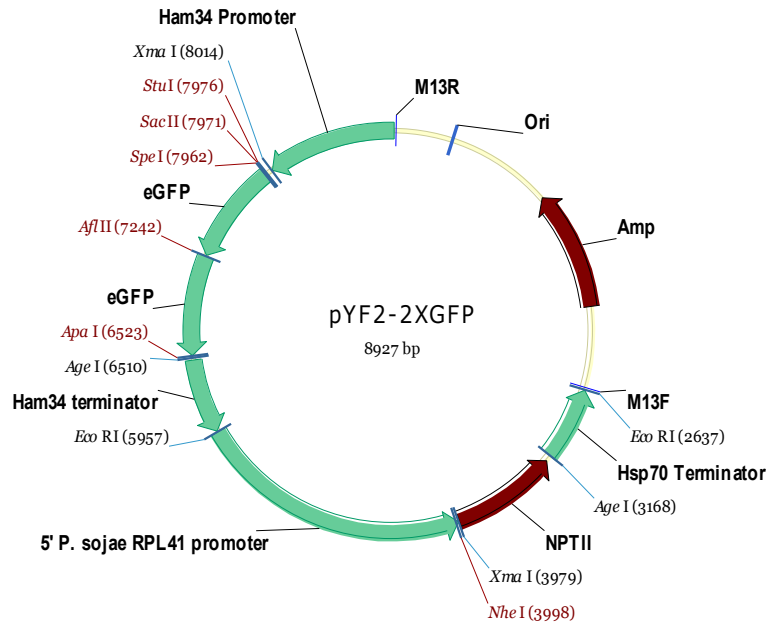**B**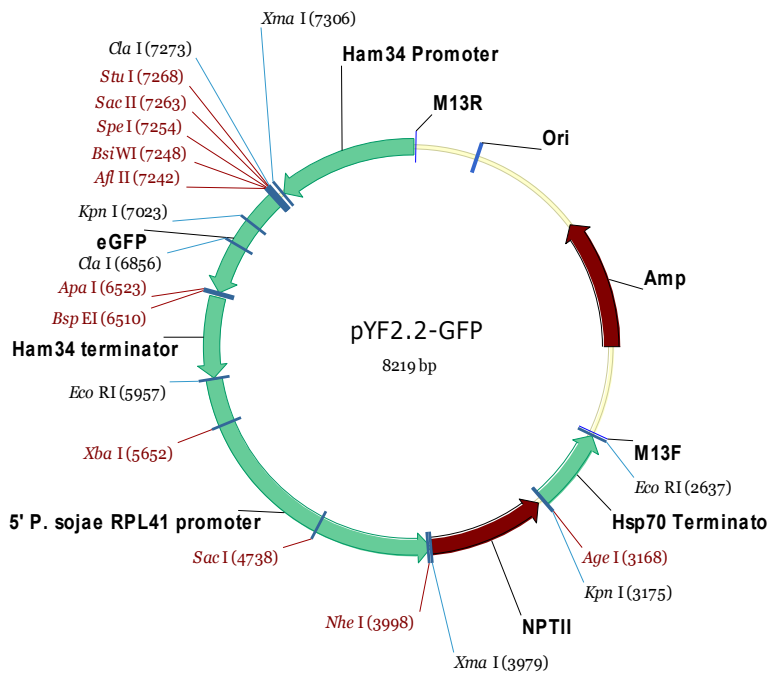

**Fig. S4** Plasmid backbones used for expression of *hSpCas9* and sgRNA in *P. sojae*. (A) pYF2-2XGFP is used for tracking the subcellular localization and expression of PsNLS fused *hSpCas9*. PsNLS is inserted into *Sac* II and *Spe* I sites. *hSpCas9* is inserted into *Spe* I and *Afl* II sites for subcellular localization examination and *Spe* I and *Apa* I sites for CRISPR expression. (B) pYF2.2-GFP is used for expression of sgRNA (inserted into *Nhe* I and *Age* I sites).
